# Supplementary material for: Prevalence of context effects: testing with a straightforward question of yesterday happiness
Source: Springer Nature journal article supplement (doi:10.1007/s11136-018-1868-6), 2018-05-03
Supplement: MOESM1 [file 15737772]

**Appendix**

Table A-1 Four lists of 12 affects

| A | B | C | D |
| --- | --- | --- | --- |
| Frustrated | Frustrated | **Happy** | Enthusiastic |
| Sad | Angry | Lonely | Frustrated |
| Enthusiastic | Bored | Content | Sad |
| Lonely | Tired | Stressed | Content |
| Content | Sad | Bored | Bored |
| Worried | **Happy** | Angry | Tired |
| Bored | Enthusiastic | Frustrated | Worried |
| **Happy** | Stressed | Tired | Lonely |
| Angry | Content | Enthusiastic | Stressed |
| Tired | Worried | Worried | Angry |
| Stressed | Lonely | Sad | **Happy** |
| Pain | Pain | Pain | Pain |

Table A-2 Mean marginal effects of the preceding sadness question on happiness: Generalized ordered probit

|  | 1 | 2 |
| --- | --- | --- |
|  | Not at all happy | Very happy |
| Panel A: Men |  |  |
| No preceding question | reference | reference |
| Sad | 0.050  (0.011)* | 0.004  (0.010) |
| Bored | 0.027  (0.010)* | 0.046  (0.009)* |
| Angry | 0.032  (0.010)* | 0.032  (0.009)* |
| Panel B: Women |  |  |
| No preceding question | reference | reference |
| Sad | 0.018  (0.013) | 0.009  (0.010) |
| Bored | 0.019  (0.011) | 0.028  (0.008)* |
| Angry | 0.012  (0.011) | 0.029  (0.007)* |
| Covariates | No | No |

Notes: The sample size was 10,161 for men and 11,531 for women. We applied sampling weights. Standard errors clustered at the county level are in parentheses. *: p-value<0.05.

Table A-3 Mean marginal effects of the preceding sadness question on happiness: Ordered probit

|  | 1 | 2 | 3 |
| --- | --- | --- | --- |
|  | A little happy | Somewhat happy | Quite a bit happy |
| Panel A: Men |  |  |  |
| No preceding question | reference | reference | reference |
| Sad | 0.018  (0.006)* | 0.006  (0.002)* | -0.023  (0.008)* |
| Bored | -0.006  (0.005) | -0.002  (0.002) | 0.006  (0.005) |
| Angry | 0.002  (0.004) | 0.001  (0.002) | -0.003  (0.005) |
| Panel B: Women |  |  |  |
| No preceding question | reference | reference | reference |
| Sad | 0.012  (0.004)* | 0.004  (0.001)* | -0.013  (0.005)* |
| Bored | 0.002  (0.004) | 0.001  (0.001) | -0.002  (0.003) |
| Angry | -0.002  (0.004) | -0.001  (0.001) | 0.002  (0.004) |
| Covariates | Yes | Yes | Yes |

Notes: The sample size was 10,161 for men and 11,531 for women. We controlled for the following covariates: age, age squared, ethnicity, marital status, education, income in the past month, no (vs. positive) income, day of the week, rural (vs. urban) residence, and county fixed effects. We applied sampling weights. Standard errors clustered at the county level are in parentheses. *: p-value<0.05.

Table A-4 Mean marginal effects of the preceding sadness question on saying very happy

| Subgroup | Marginal Effect |
| --- | --- |
| Men | -0.021  (0.005)* |
| Women | -0.023  (0.006)* |
| Non-Javanese | -0.020  (0.005)* |
| Javanese | -0.023  (0.006)* |
| Primary school | -0.021  (0.005)* |
| Senior high school | -0.022  (0.005)* |
| Urban resident | -0.023  (0.006)* |
| Rural resident | -0.021  (0.005)* |

Notes: The sample size was 21,692. We controlled for the following covariates: sex, age, age squared, ethnicity, marital status, education, income in the past month, no (vs. positive) income, day of the week, rural (vs. urban) residence, and county fixed effects. We applied sampling weights. Standard errors clustered at the county level are in parentheses. *: p-value<0.05. We omitted the marginal effects of the preceding questions regarding being bored and angry because they were not statistically significant in all cases.

Figure A-1 Interaction effects of the boredom response with the four versions of a list of 12 affects on the probability of saying very happy for women

Notes: The sample size was 11,531. Capped spikes indicate 95% confidence intervals. We controlled for no covariate, applied sampling weights, and clustered standard errors at the county level.
